# Supplementary material
Source: HighWire-hosted journal article supplement (doi:10.1101/rna.055236.115)
Supplement: Supplemental__Materials.docx [file Supplemental__Materials.docx]

Table S1; Strains, plasmids and primers used in this work

**Strains Relevant characteristics Source or Reference**

MG1655 CGSC6300 CGSC

MG1508 MG1655 *mal::lacIq PLtetO-1-cat-sacB-lacZ*, ([Coornaert et al. 2013](#_ENREF_2))

*mini-* TetR

CA244-*pnp* *lacZ trp relA spoT pnp::Tn5* KanR([Li et al. 1998](#_ENREF_8))

N3433 HfrH *lacZ43*  *relA1* *spoT1 thi1* D. Apirion

N3431 N3433 *rne*3071ts ([Goldblum and Apirion 1981](#_ENREF_4))

IBPC 633 N3433 *rnc*105 ([Régnier and Hajnsdorf 1991](#_ENREF_11))

IBPC 637 N3431 *rnc*105 ([Régnier and Hajnsdorf 1991](#_ENREF_11))

IBPC 935 N3433 *rng*::CmR ([Joanny et al. 2007](#_ENREF_6))

IBPC 934 N3431 *rng*::CmR ([Joanny et al. 2007](#_ENREF_6))

IBPC 932 IBPC 633 *rng*::CmR This work

IBPC 933 IBPC 637 *rng*::CmR This work

IBPC 903 N3433 *pcnB* KanR ([Joanny et al. 2007](#_ENREF_6))

IBPC 953 N3433 *hfq* TetR ([Ziolkowska et al. 2006](#_ENREF_12))

N3433-*pnp* N3433 *pnp::Tn5* KanR This work

IBPC633-*pnp* IBPC 633 *pnp::Tn5* KanR This work

FF4  MG1508 *pnp::lacZ* This work

FF19  FF4 *rnc*105 This work

FF55 N3433 PSraG*mut* This work

FF56 N3433 P2*mut* This work

FF57 N3433 TTG*mut* This work

CAN/20-12E RNase BN- II-, D- I- ([Cheng et al. 1998](#_ENREF_1))

MG1655* *rph*+ M. P. Deutscher

MG1655*RBN-*rph*+ RBN- M. P. Deutscher

NHY312Δ(*proB lac) ara gyrA thi zic-501::Tn10* ([Kirsebom et al. 1988](#_ENREF_7))

NHY322 NHY312 *rnpA49ts* ([Kirsebom et al. 1988](#_ENREF_7))

**Plasmids**

pB15.6 ([Plumbridge and Springer 1983](#_ENREF_10))

pBRplac pBR322 derivative carrying a modified ([Guillier and Gottesman 2006](#_ENREF_5))

PLlacO-1 promoter, AmpR, TetR

pBRSraG-S *sraG*short under modified PLlacO-1 in This work

pBRplac, AmpR

pBRSraG *sraG* under modified PLlacO-1 in This work

pBRplac, AmpR

**Primers**

*cRT-PCR*

m423-442 GCTGACGGCAGCAATTCACT

m1 GATCTTCCGTTGCAGAGGTT

rpsO441 GCAACAATACATTAGTTTCCAG

*Riboprobes*

mpnp3 GCCAAACCAGGTCAGGACTTC

T7pnp4 TAATACGACTCACTATAGGGTTAACAGAAACCACGGT

mSraG2 ATCTTCTGCGCATCCTCG

T7SraG3 TAATACGACTCACTATAGGGCAGCAATTCACTGGAAAC

T7RNET2 TAATACGACTCACTATAGGGAAAAAAGGGGCCACTCAGG

FNrpsO05 GCTTAACGTCGCGTAAATTG

5S ACTACCATCGGCGCTACGGC

*Cloning*

BamH1-sraG5 CCCCGGATCCTAATTCTTGCGAGTTTCAGAAAAG

AatII-sraG4 CGTGACGTCATCTTCTGCGCATCCTCGCG

AatII-sraG6 GCGTGACGTCTCTTTCTTAGACAGTACCTTACG

mrpsO-apTetI GCGAAGCGGCATGCATTTACGTTGACACCATCGAATGGCGCTTGA

ATACCCGGCGTAAT

| pnp-lacZI | TAACGCCAGGGTTTTCCCAGTCACGACGTTGTAAAACGACAACGGTC  AGTGGGAAGAA |
| --- | --- |

5’cat-sacB TTCACTGGAAACTAATGTATTGTTGCTATGAATGATCTTCCGAAAATG

AGACGTTGATCGGCACG

3’cat-sacB GATTAAGCAATGTAATATCCTTTCTCTTTCTTAGACAGTACCATCA

AAGGGAAAACTGTCCATAT

WT-down ACGAACGATCGGATTAAGCAATG

WT-UP GCAGCAATTCACTGGAAACTAATGTATTGTTGCTATGAATGATCTT CCG

sraGlongTATAmutdown CACGGTGTGTTGGCCGTACTGGAATTTACGAACGATCGGATT

AAGCAATGTTGGTTCCTTTCTCTTTC)

PnpTTGmutdown CACGGTGTGTTGGCCGTACTGGAATTTACGAACGATCGGATTAAGTCA

TGTAATATCCTTTCTCTTTC

Mut-P2-UP CCTTTTTTCAAGCTGACGGCAGCAATTCACTGGAAACTAATGATTCGC

TGCTATGAATGATCTTCCG

*In vitro transcription*

mT7-pnp1 TAATACGACTCACTATAGGGATGAATGATCTTCCGTTGCAGAGG

RNX1 CCTGACGAGCCATCATGC

T7mSraG1 TAATACGACTCACTATAGGGTCTTTCTTAGACAGTACCTTACGG

T7mSraG2 TAATACGACTCACTATAGGGATCTTCTGCGCATCCTCGC

sraGter2 GAAAAGGGGGCCTGAGTG

***Supplementary materials***

**Bacterial strains**

A *pnp–lacZ* fusion was constructed on the chromosome at *lacZ* locus. The transcriptional-translational fusion encompassing the *pnp* promoter and translation initiation region from -822 to +123 with respectto the start codon was amplified from genomic MG1655 DNA with oligonucleotides mrpsO-apTetI and pnp-lacZI. These primers carry extensions homologous to region upstream to pTet promoter and downstream of the *lacZ* ORF of MG1508. This allows recombination in MG1508, which contains a *cat-sacB* cassette downstream of the PLtetO-1 promoter and upstream of the *lacZ* gene containing a minired-gam prophage ([Mandin and Gottesman 2009](#_ENREF_9)).

To construct mutations, the *cat-sac* cassette was inserted on the chromosome between the *rpsO* and *pnp* genes in N3433. A PCR fragment was amplified from strain MG1508 with primers 5’cat-sacB and 3’cat-sacB, which carry homology regions to the *rpsO-pnp* intergenic region upstream of P2 promoter. This allows introduction of the *cat-sacB* cassette by recombination into N3433 strain containing the miniTet red-gam prophage.The PSraG*mut* mutant was obtained by electroporation of N3433-*cat-sac* strain with a PCR fragment amplified with primers WT-down and sraGlongTATAmutdown and selecting for sucrose resistance and screening for chloramphenicol sensitivity. The TTG*mut* and the P2*mut* mutant were obtained in the same way with primers WT-UP and PnpTTGmutdown and Mut-P2-UP and WT-down respectively.

SraG overproducing plasmids. *sraG* gene was PCR amplified from *E. coli* with sraG5 and AatII-sraG4 or AatII-sraG6. PCR products were digested with AatII and EcoRI, cloned into the corresponding sites of pBR-plac ([Guillier and Gottesman 2006](#_ENREF_5)) giving pBR-plac-SraG (pBRSraG) and pBR-plac-SraG short (pBRSraG-S) respectively. Expression of SraG and SraG-S was induced by the addition of 20 to 100 μM IPTG either at the beginning of the culture or during the exponential phase.

**Band shift analysis**

HfqHis6 was overexpressed and purified as described ([Ziolkowska et al. 2006](#_ENREF_12)). Band-shift assays were performed as in ([Folichon et al. 2003](#_ENREF_3)) with Hfq concentrations expressed on the basis of the hexamer form. 5′ end-labeled RNAs were mixed with increasing concentrations of Hfq ranging from 0 pM to 100 nM. The radioactivity signal above the level of the free RNA was counted as retarded RNA on the gel. Data were analyzed and fitted to the Hill equation using Kaleidagraph and the K1/2 (half saturation values) were derived from the fit of the data.

***References***

Cheng Z-F, Zuo Y, Li Z, Rudd KE, Deutscher MP. 1998. The *vacB* gene required for virulence in *Shigella flexneri* encodes the exoribonuclease RNase R. *J Biol Chem* **273**: 14077-14080.

Coornaert A, Chiaruttini C, Springer M, Guillier M. 2013. Post-transcriptional control of the *Escherichia coli* PhoQ-PhoP two-component system by multiple sRNAs involves a novel pairing region of GcvB. *PLoS Genet* **9**(1): e1003156.

Folichon M, Arluison V, Pellegrini O, Huntzinger E, Régnier P, Hajnsdorf E. 2003. The poly(A) binding protein Hfq protects RNA from RNase E and exoribonucleolytic degradation. *Nucleic Acids Res* **31**(24): 7302-7310.

Goldblum K, Apirion D. 1981. Inactivation of the ribonucleic acid-processing enzyme ribonuclease E blocks cell division. *J Bacteriol* **146**(1): 128-132.

Guillier M, Gottesman S. 2006. Remodelling of the *Escherichia coli* outer membrane by two small regulatory RNAs. *Mol Microbiol* **59**: 231-247.

Joanny G, Le Derout J, Bréchemier-Baey D, Labas V, Vinh J, Régnier P, Hajnsdorf E. 2007. Polyadenylation of a functional mRNA controls gene expression in *E. coli*. *Nucleic Acids Res* **35**: 2494-2502.

Kirsebom LA, Baer MF, Altman S. 1988. Differential effects of mutations in the protein and RNA moieties of RNase P on the efficiency of suppression by various tRNA suppressors. *J Mol Biol* **204**: 879-888.

Li Z, Pandit S, Deutscher MP. 1998. 3' exoribonucleolytic trimming is a common feature of the maturation of small, stable RNAs in *Escherichia coli*. *Proc Natl Acad Sc USA* **95**: 2856-2861.

Mandin P, Gottesman S. 2009. A genetic approach for finding small RNAs regulators of genes of interest identifies RybC as regulating the DpiA/DpiB two-component system. *Mol Microbiol* **72**(3): 551-565.

Plumbridge JA, Springer M. 1983. Organization of the *Escherichia coli* chromosome around the genes for translation initiation factor IF2 (*inf2*) and a transcription terminator factor (*nusA*). *J Mol Biol* **167**: 227-243.

Régnier P, Hajnsdorf E. 1991. Decay of mRNA encoding ribosomal protein S15 of *Escherichia coli* is initiated by an RNaseE-dependent endonucleolytic cleavage that removes the 3' stabilizing stem and loop structure. *J Mol Biol* **217**: 283-292.

Ziolkowska K, Derreumaux P, Folichon M, Pellegrini O, Régnier P, Boni IV, Hajnsdorf E. 2006. Hfq variant with altered RNA binding functions. *Nucleic Acids Res* **34**(2): 709-720.
